# Supplementary material for: Immune Subtyping in Latent Tuberculosis
Source: PubMed Central journal article supplement (PMC8059438; doi:10.3389/fimmu.2021.595746), 2021-04-07
Supplement: DataSheet_1.pdf [file DataSheet_1.pdf]

**Supplementary Table S1.A:** Selected previous literature reports suggesting role of the 10 identified IPLTB in latent or active tuberculosis.

| Pathway                        | Literature report in context of LTB or TB                                                                                                                                                                                                                                                                                                                                                                                                                                | Reference                                                             |
|--------------------------------|--------------------------------------------------------------------------------------------------------------------------------------------------------------------------------------------------------------------------------------------------------------------------------------------------------------------------------------------------------------------------------------------------------------------------------------------------------------------------|-----------------------------------------------------------------------|
| IL12/ IFN $\gamma$ axis        | <p>IL12 produced by macrophages after <i>Mtb</i> endocytosis induces T-cells activation into CD4+ and CD8+ cells, which can secrete IFN<math>\gamma</math>. Both IL12 and IFN<math>\gamma</math> have been implicated in promoting host resistance to <i>Mtb</i>.</p> <p>Mutations in several genes in the IL12/IFN<math>\gamma</math> axis have been implicated in the rare congenital disease known as Mendelian susceptibility to mycobacterial diseases (MSMDs).</p> | [Bustamante et al, 2007, deJong et al, 1998, Serbina and Flynn, 2001] |
| IL2 mediated signaling         | <p>IL2 increases cellular immunity against TB and promotes granuloma formation and is reported to have a high level in mice with latent TB. LTB patients have been shown to have high levels of TH1 cytokines, including IL2.</p>                                                                                                                                                                                                                                        | [Demissie et al, 2004, Howard and Zwilling, 1999]                     |
| IL4 mediated signaling         | <p>Increased production of the anti-inflammatory cytokine IL4 can promote pathogenesis of pulmonary TB.</p> <p>Increased amounts of IL4 have been implicated in LTBI reactivation in health care workers.</p> <p>Increased expression of IL4 antagonists have been shown to be high in LTBI cases.</p>                                                                                                                                                                   | [Demissie et al, 2004, Howard and Zwilling, 1999, Ordway et al, 2004] |
| TLR2 mediated signaling        | <p>TLR2 is known to recognize patterns in <i>Mtb</i> cell surface and induce Th1 cell response by cytokine secretion. MyD88 deficiency can cause hypersusceptibility to <i>Mtb</i> infection in mice.</p> <p>Multiple reports have shown polymorphisms in TLR2 gene to be associated with susceptibility to TB.</p>                                                                                                                                                      | [Byun et al, 2012, Sanchez et al, 2010, Thoma-Uszynski et al, 2001]   |
| TNF $\alpha$ mediated response | <p>TNF<math>\alpha</math> can help in granuloma formation and maintenance of <i>Mtb</i> dormancy in humans, at the same time it is known to cause tissue damage and promotion of <i>Mtb</i> growth in monocytes.</p>                                                                                                                                                                                                                                                     | [Hernandez-Pano and Rook, 1994, Mootoo et al,                         |

|                                |                                                                                                                                                                                                                                               |                                                             |
|--------------------------------|-----------------------------------------------------------------------------------------------------------------------------------------------------------------------------------------------------------------------------------------------|-------------------------------------------------------------|
|                                | Anti-TNF therapy has also been reported to reactivate LTBI in clinical studies.                                                                                                                                                               | 2009, Shim 2014, Wallis et al, 2004]                        |
| PDGFR signaling pathway        | PDGF can be linked to delayed type hypersensitivity response and fibrotic reaction in pulmonary TB.                                                                                                                                           | [Klinkhammer et al, 2018, Wangoo et al, 1993]               |
| EGFR signaling pathway         | EGF, the ligand for the ERBBs, has receptors on <i>Mtb</i> surface as well and can help in bacterial growth within macrophages.<br>A case study showed the EGFR inhibitor erlotinib prescription to a lung cancer patient to reactivate LTBI. | [Bermudez et al, 1996, Lee et al, 2017]                     |
| FGFR signaling pathway         | No direct report on action of FGFR in TB                                                                                                                                                                                                      |                                                             |
| TGF $\beta$ mediated signaling | TGF $\beta$ is excessively produced in active TB.<br>It is suggested as a potential target to increase bacterial clearance by promoting cytotoxic T-cell activity.                                                                            | [DiFazio et al, 2016, Jayaswal et al, 2010, Wu et al, 2012] |

**Supplementary Table S1.B:** Details of datasets with active TB and uninfected samples used in analysis of Section 4.4

| GEO ID    | Platform                      | Uninfected Samples | Active TB Samples | Geographic Location | Age Group | Reference              |
|-----------|-------------------------------|--------------------|-------------------|---------------------|-----------|------------------------|
| GSE19435  | Illumina<br>GPL6947           | 12                 | 7                 | UK                  | Adult     | Berry et al, 2010      |
| GSE19439  | Illumina<br>GPL6947           | 12                 | 13                | UK                  | Adult     | Berry et al, 2010      |
| GSE19444  | Illumina<br>GPL6947           | 12                 | 21                | UK                  | Adult     | Berry et al, 2010      |
| GSE28623  | Agilent<br>GPL4133            | 37                 | 46                | The Gambia          | Adult     | Maertzdorf et al, 2011 |
| GSE34608  | Agilent<br>GPL6480            | 18                 | 8                 | Germany             | Adult     | Maertzdorf et al, 2012 |
| GSE42825  | Illumina<br>GPL10558          | 23                 | 8                 | UK                  | Adult     | Bloom et al, 2013      |
| GSE42826  | Illumina<br>GPL10558          | 52                 | 11                | UK                  | Adult     | Bloom et al, 2013      |
| GSE42830  | Illumina<br>GPL10558          | 38                 | 16                | UK                  | Adult     | Bloom et al, 2013      |
| GSE56153  | Illumina<br>GPL6883           | 18                 | 18                | Indonesia           | Adult     | Ottenhoff et al, 2012  |
| GSE83456  | Illumina<br>GPL10558          | 61                 | 45                | UK                  | Adult     | Blankley et al, 2016   |
| GSE84076  | Illumina<br>HiSeq<br>GPL16791 | 12                 | 8                 | Brazil              | Adult     | De Araujo et al, 2016  |
| GSE107731 | Affymetrix<br>GPL15207        | 3                  | 3                 | China               | Adult     | -                      |

References:

1. Berry, M. P. R., Graham, C. M., McNab, F. W., Xu, Z., Bloch, S. A. A., Oni, T., et al. (2010). An interferon-inducible neutrophil-driven blood transcriptional signature in human tuberculosis. *Nature* 466, 973–977. doi:10.1038/nature09247
2. Maertzdorf, J., Ota, M., Repsilber, D., Mollenkopf, H. J., Weiner, J., Hill, P. C., et al. (2011). Functional correlations of pathogenesis-driven gene expression signatures in tuberculosis. *PloS One* 6, e26938. doi:10.1371/journal.pone.0026938
3. Maertzdorf, J., Weiner, J., Mollenkopf, H.-J., Network, T., Bauer, T., Prasse, A., et al. (2012). Common patterns and disease-related signatures in tuberculosis and sarcoidosis. *Proceedings of the National Academy of Sciences* 109, 7853–7858. doi:10.1073/pnas.1121072109.
4. Bloom, C. I., Graham, C. M., Berry, M. P. R., Rozakeas, F., Redford, P. S., Wang, Y., et al. (2013). Correction: Transcriptional Blood Signatures Distinguish Pulmonary Tuberculosis, Pulmonary Sarcoidosis, Pneumonias and Lung Cancers. *PLoS ONE* 8. doi:10.1371/annotation/7d9ec449-ae0-48fe-8111-0c110850c0c1.

5. Ottenhoff, T. H. M., Dass, R. H., Yang, N., Zhang, M. M., Wong, H. E. E., Sahiratmadja, E., et al. (2012). Genome-Wide Expression Profiling Identifies Type 1 Interferon Response Pathways in Active Tuberculosis. *PLoS ONE* 7. doi:10.1371/journal.pone.0045839.
6. Blankley, S., Graham, C. M., Turner, J., Berry, M. P. R., Bloom, C. I., Xu, Z., et al. (2016). The Transcriptional Signature of Active Tuberculosis Reflects Symptom Status in Extra-Pulmonary and Pulmonary Tuberculosis. *Plos One* 11. doi:10.1371/journal.pone.0162220.
7. Araujo, L. S. D., Vaas, L. A. I., Ribeiro-Alves, M., Geffers, R., Mello, F. C. Q., Almeida, A. S. D., et al. (2016). Transcriptomic Biomarkers for Tuberculosis: Evaluation of DOCK9, EPAA4, and NPC2 mRNA Expression in Peripheral Blood. *Frontiers in Microbiology* 7. doi:10.3389/fmicb.2016.01586.
